# Supplementary material
Source: PubMed Central journal article supplement (PMC5321824)
Supplement: NIHMS839152-supplement-1.pdf [file NIHMS839152-supplement-1.pdf]

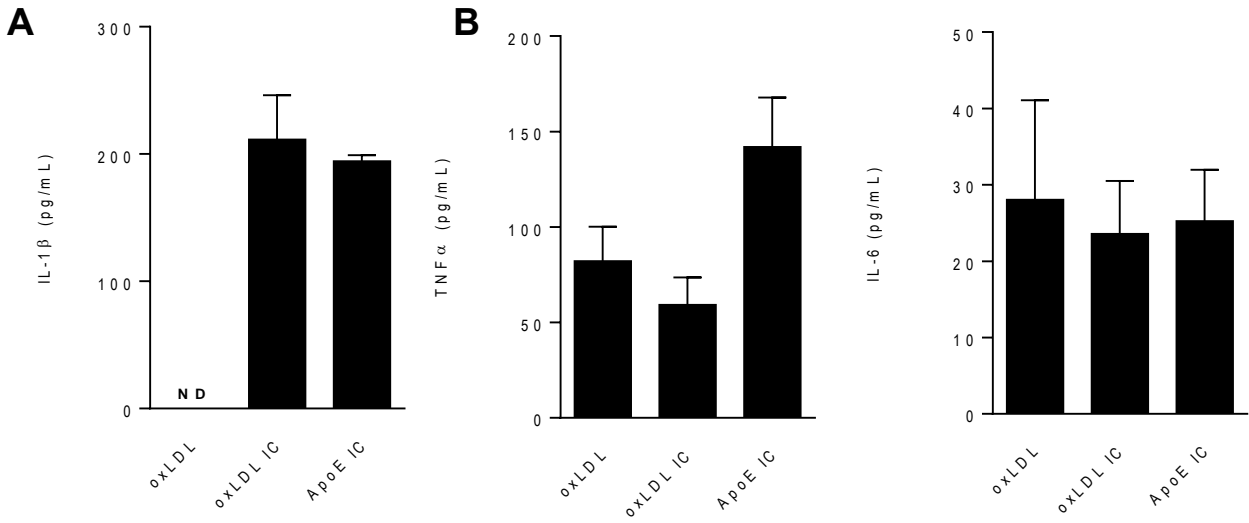

**Supplementary Figure 1. OxLDL-ICs elicit similar cytokine profiles from BMDMs. (A)**

BMDMs were treated for 3 hours with oxLDL, oxLDL-ICs, or ApoE-ICs followed by ATP for an additional hour. IL-1 $\beta$  was measured in culture supernatants by ELISA. Shown is one representative of 3 similar experiments. Error bars represent SD. **(B)** BMDMs were treated with oxLDL, oxLDL-ICs, or ApoE-ICs overnight. TNF $\alpha$  (right) and IL-6 (left) in culture supernatants were measured by ELISA. Shown is one representative of 3 similar experiments. Error bars represent SD.

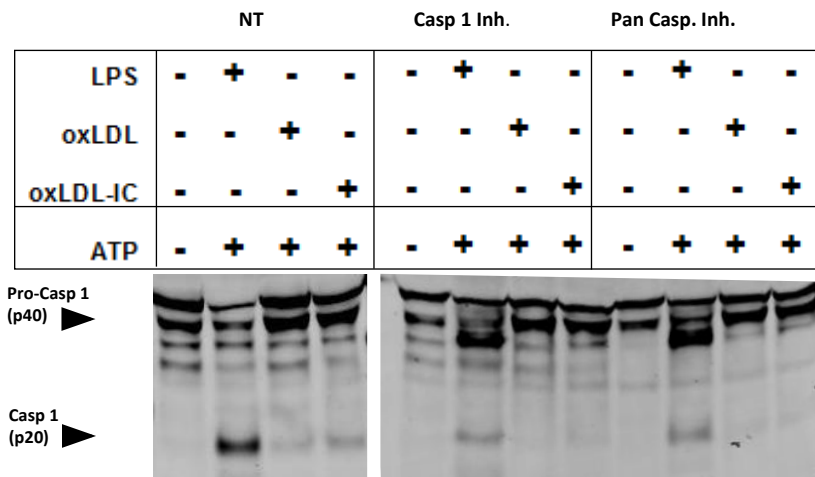

**Supplementary Figure 2.** BMDCs were stimulated for 3 hours with oxLDL or oxLDL-IC followed by lysis in RIPA buffer and Western blot for pro-caspase 1 and cleaved caspase-1.
